# Supplementary material for: Single-crystalline integrated 4H-SiC nanochannel array electrode: toward high-performance capacitive energy storage for robust wide-temperature operation
Source: Royal Society of Chemistry journal article supplement (doi:10.1039/c8mh00474a), 2018-01-01
Supplement: c8mh00474a1.pdf [file c8mh00474a1.pdf]

**Electronic Supplementary Material (ESI) for Materials Horizons.  
This journal is © The Royal Society of Chemistry 2018**

**Single-crystalline Integrated 4H-SiC Nanochannel Array Electrode:  
toward High-performance Capacitive Energy Storage for Robust  
Wide-temperature Operation**

Weijun Li, Qiao Liu, Shanliang Chen, Zhi Fang, Xu Liang, Guodong Wei, Lin Wang,  
Weiyu Yang\*, Yuan Ji\* and Liqiang Mai\*

## Experimental Section

### *Preparation of integrated SiC NCAs electrode*

The single-crystalline 4H-SiC wafers were 350  $\mu\text{m}$  in thickness with a crystallographic orientation of exposed  $\{1010\}$  plane and a N doping concentration of 9.8 *at.%*, which are commercially available. The SiC wafers were cut into sheets of  $0.7 \times 1.5 \text{ cm}^2$ , and washed by ultrasonic treatments successively in acetone, ethanol and deionized water. Then they were immersed into a diluted HF solution (the volume ratio of 40 % HF:99 %  $\text{C}_2\text{H}_5\text{OH} = 1:1$ ) for 2 min to clear the oxides on the surface. In a typical procedure, the SiC sheet and graphite wafer ( $2 \text{ cm} \times 4 \text{ cm}$ ) were utilized as the anode and cathode, respectively. A two-stepped procedure was designed to prepare integrated SiC nanoarrays based on an electrochemical anodic oxidation technique at RT. In the first step, the etching medium was set in  $\text{NH}_4\text{HF}$  saturated solution. The pulsed voltage applied was kept constant at 18 V with a cycle time ( $T$ ) of 0.8 ms and a pause time ( $T_{\text{off}}$ ) of 0.4 ms. The total anodizing time was fixed at 1 min. At the second step, the SiC wafer was oxidized in another etching solution for 5 min at RT, which was composed of HF (40% purity),  $\text{C}_2\text{H}_5\text{OH}$  (99% purity) and  $\text{H}_2\text{O}_2$  (30% purity) with a volume ratio of HF: $\text{C}_2\text{H}_5\text{OH}$ : $\text{H}_2\text{O}_2 = 3:6:1$ . The applied current kept constant at 120 mA with a cycle time ( $T$ ) of 0.8 ms and a pause time ( $T_{\text{off}}$ ) of 0.4 ms.

### *The growth mechanism of SiC NCAs*

The etching of SiC *via* anodic oxidation can be divided into two main steps. One is the generation of  $\text{SiO}_2$  and the other is the dissolution of the formed  $\text{SiO}_2$ , which are expressed as bellow:

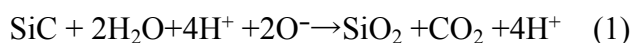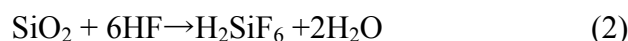

Firstly, the surface of the SiC anode sheet is partially converted into  $\text{SiO}_2$  in the HF solution with the release of  $\text{CO}_2$  via reaction (1), once the pulsed voltage is applied. Secondly, the formed  $\text{SiO}_2$  will further react with HF *via* reaction (2), making the resolution of  $\text{SiO}_2$ . The repeated reactions (1) and (2) will cause the continuous resolution of  $\text{SiO}_2$ , resulting in the etching of SiC with the formed nanoholes within the SiC wafer.

### *Structural characterizations and electrochemical measurements*

Field emission scanning electron microscopy (FESEM, S-4800, Hitachi, Japan) and high-resolution transmission electron microscopy (HRTEM, JEM-2100F, JEOL, Japan) were used for the microstructural characterization of as-fabricated SiC NCAs. The surface species and chemical states were measured by X-ray photoelectron spectroscopy (XPS, ES-CALAB 250Xi, Thermo Fisher Scientific, America). X-ray diffraction (XRD, RINT2000 V/PC, Bruker DS, Germany) was used to investigate the phase compositions.

The electrochemical measurements of the as-fabricated SiC NCAs were performed at RT in a three-electrode configuration with a platinum counter electrode and a Ag/AgCl reference electrode in 2.0 M KCl solution. The single-crystalline integrated SiC NCAs were directly applied as the working electrode, without the use of any additives such as foreign binder or current collector. The cyclic voltammetry (CV), galvanostatic charging/discharging (GCD) and electrochemical impedance spectroscopy (EIS) of the SiC NCAs were investigated on an electrochemical station (Autolab PGSTAT302N, Switzerland) with a chamber for programming temperature control (ECT100LC, EDESON, China). The specific capacitance was calculated from CV curves according to the following equation:

$$C = \frac{1}{\nu \times V} \int_{-0.1}^{0.7} i(V) dV$$

where  $i$  is the current response,  $\nu$  is the scan rate, and  $V$  corresponds to the voltage range. The specific capacitance was also calculated from GCD plots using:

$$C = \frac{i}{(-dV/dt)}$$

where  $dV/dt$  is the slope of the discharge curve.

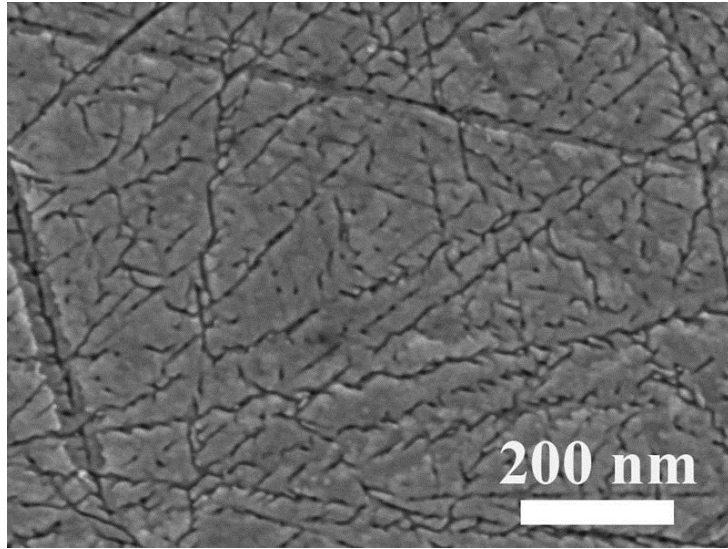

**Figure S1.** Typical top-view SEM images for the often growth of cap layer during the growth of SiC nanoarrays via the electrochemical anodic oxidation technique.

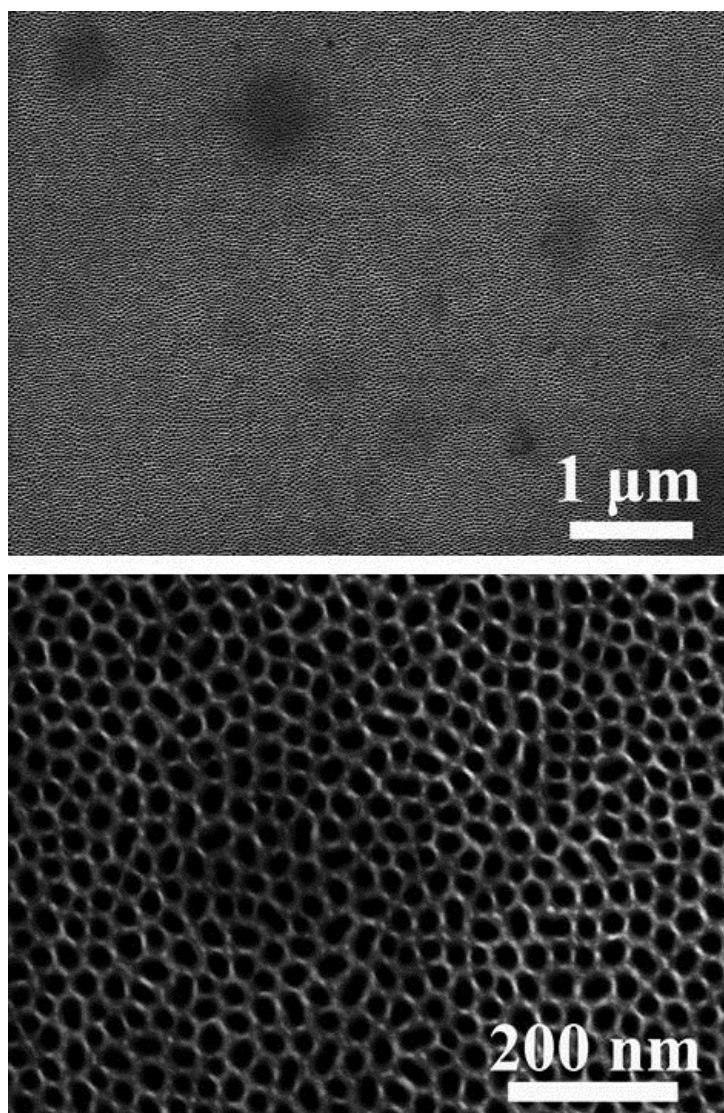

**Figure S2.** Typical SEM images of the as-fabricated SiC NCAs with fully opened heads under different magnifications.

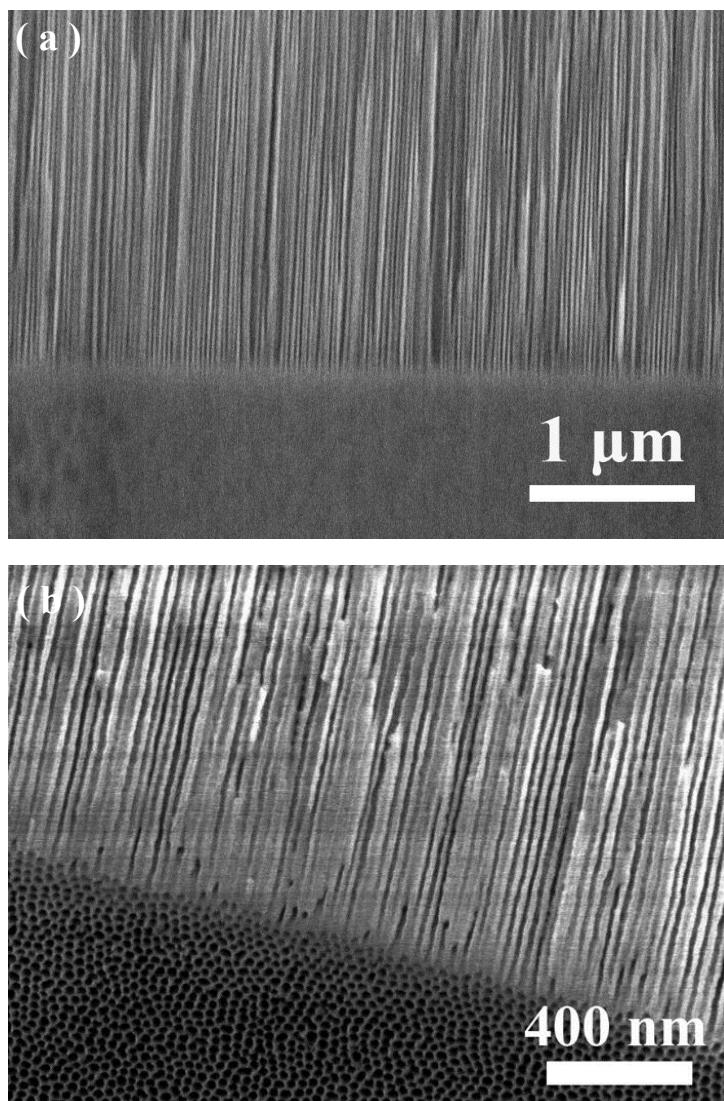

**Figure S3.** (a) Typical cross-sectional SEM image of the as-fabricated SiC NCAs. (b) Typical cross-sectional SEM image of the SiC NCA electrode after 10000 cycle test.

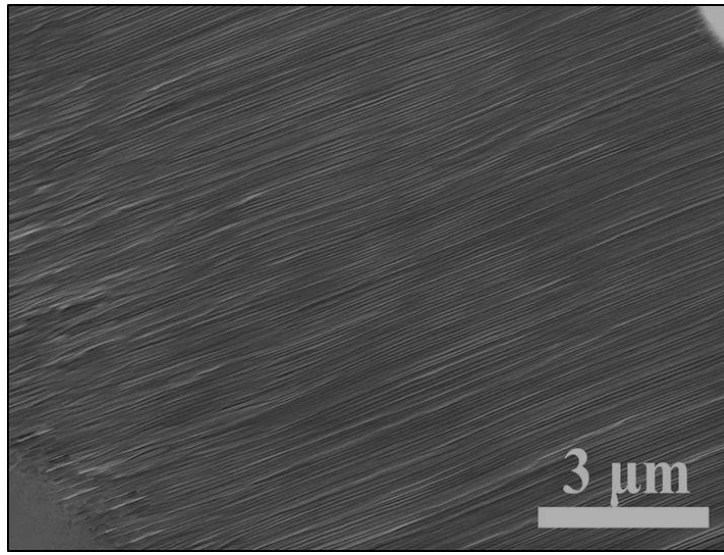

**Figure S4.** Typical cross-sectional SEM image of the SiC NCAs under a low magnification.

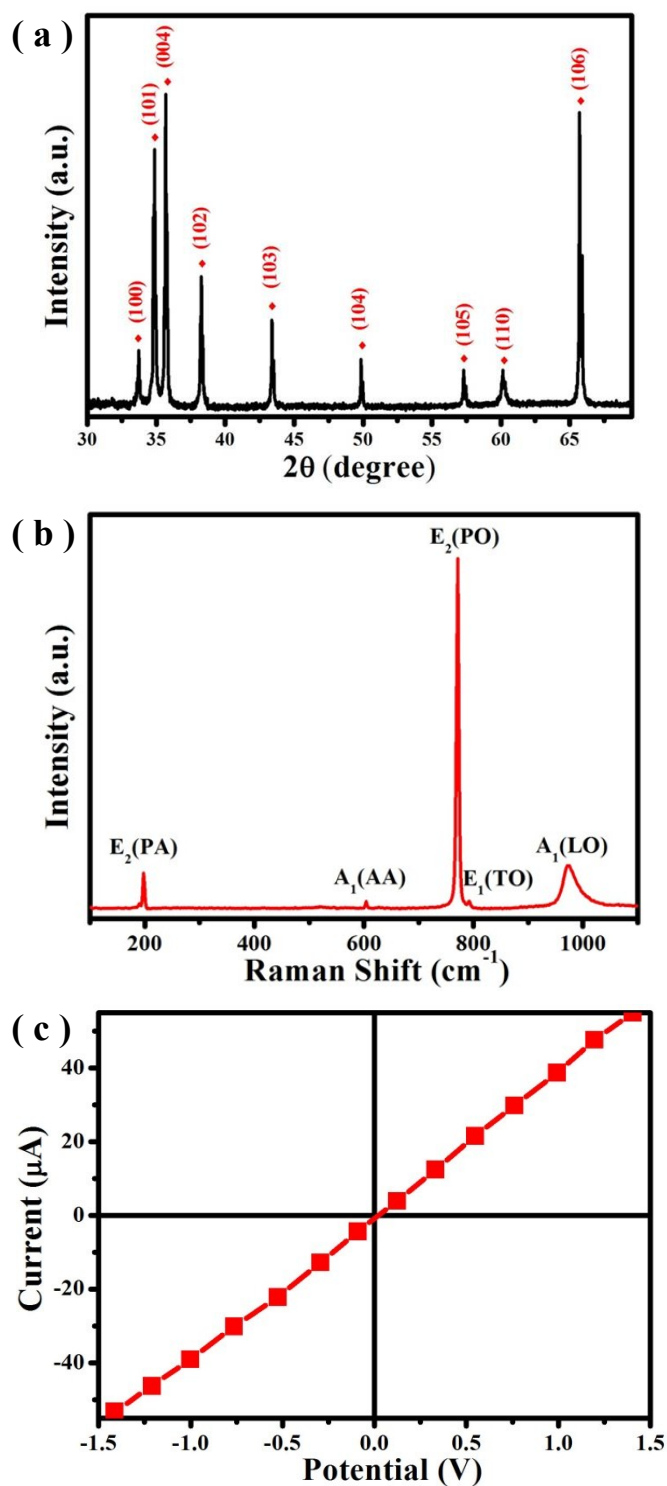

**Figure S5.** (a) Typical XRD pattern of the SiC NCAs. (b) Typical Raman spectrum of the SiC NCAs under 514.5 nm laser light at room temperature. The peak at 203.5  $\text{cm}^{-1}$  is an  $E_2$  planar or transverse acoustic (TA) mode. The peak at 610.5  $\text{cm}^{-1}$  is  $A_1$  axial or longitudinal acoustic (LA). The peak at 777.0  $\text{cm}^{-1}$  is  $E_2$  planar optical. The peak at 797.5  $\text{cm}^{-1}$  is an  $E_1$  mode, and that at 967.0  $\text{cm}^{-1}$  is  $A_1(\text{LO})$ . (c) Conductivity characterization of the SiC NCAs.



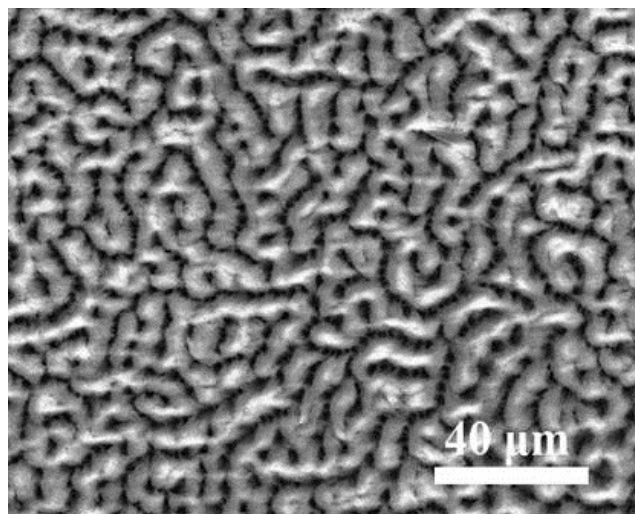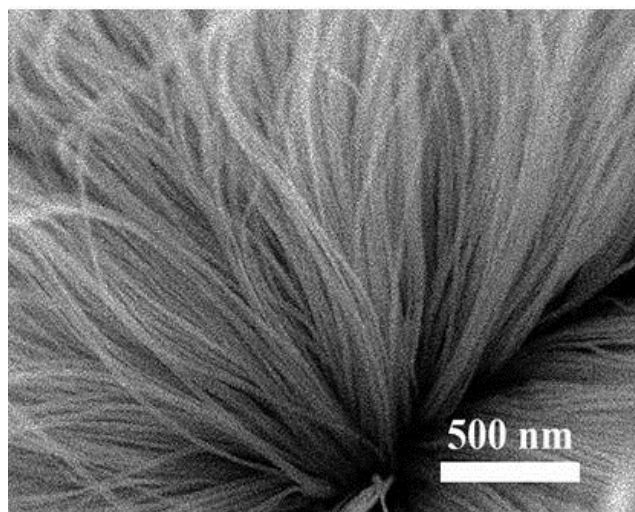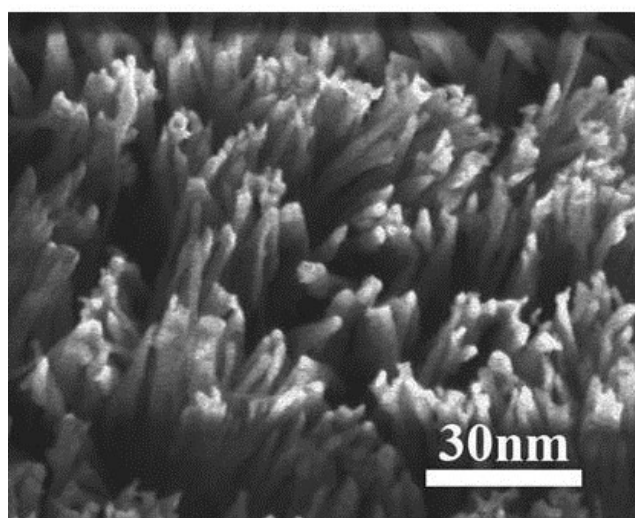

**Figure S6.** Typical SEM images of the as-prepared SiC nanowire arrays under different magnifications.

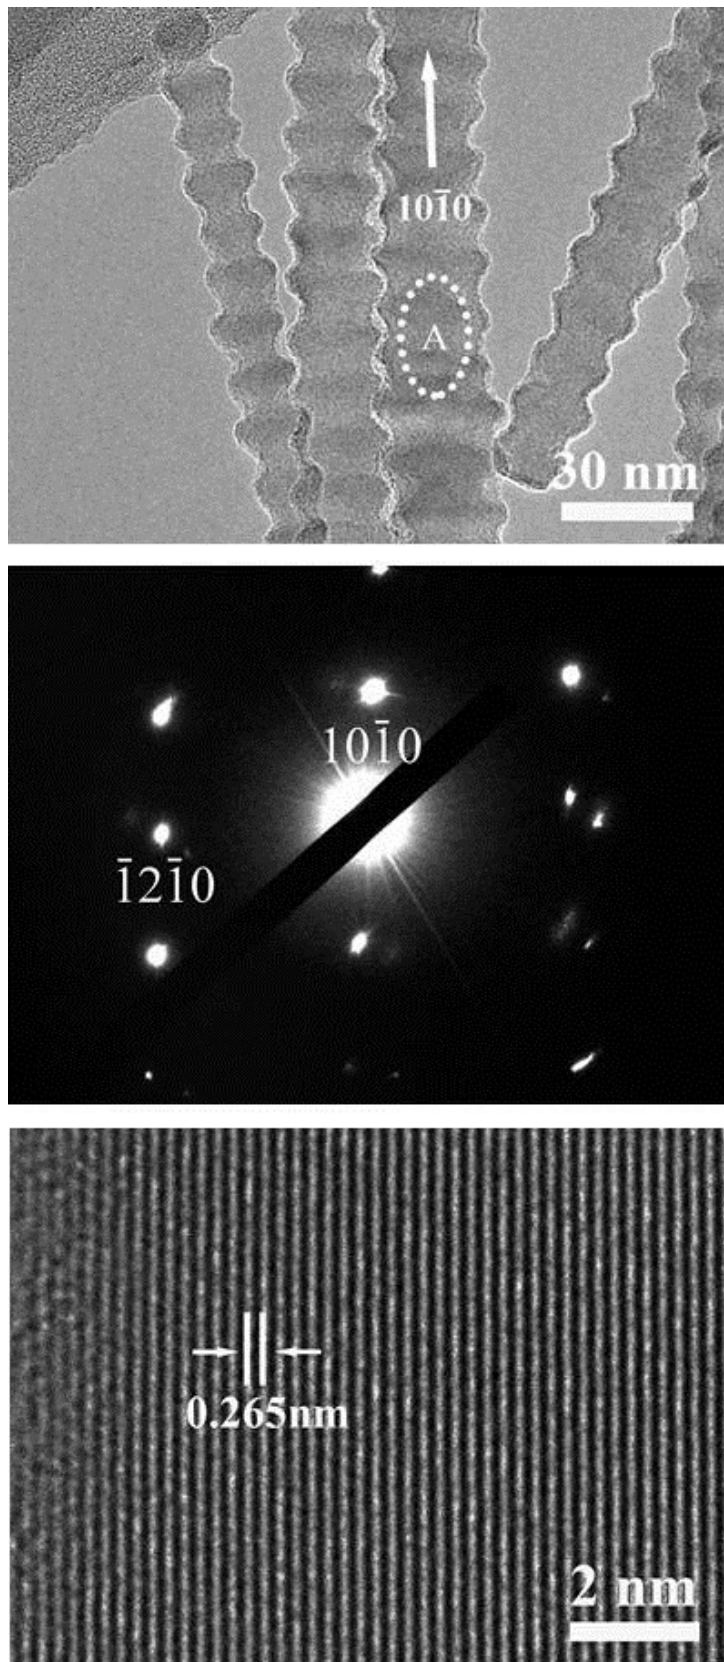

**Figure S7.** Typical TEM image, SAED pattern and HRTEM image of the as-prepared SiC nanowire arrays.



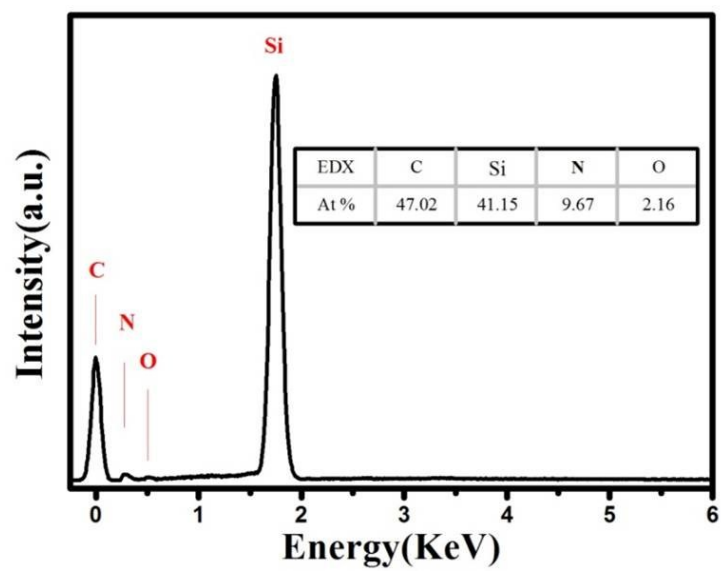

**Figure S8.** Typical EDX spectrum of the as-prepared SiC nanowire arrays (NWAs) under TEM.

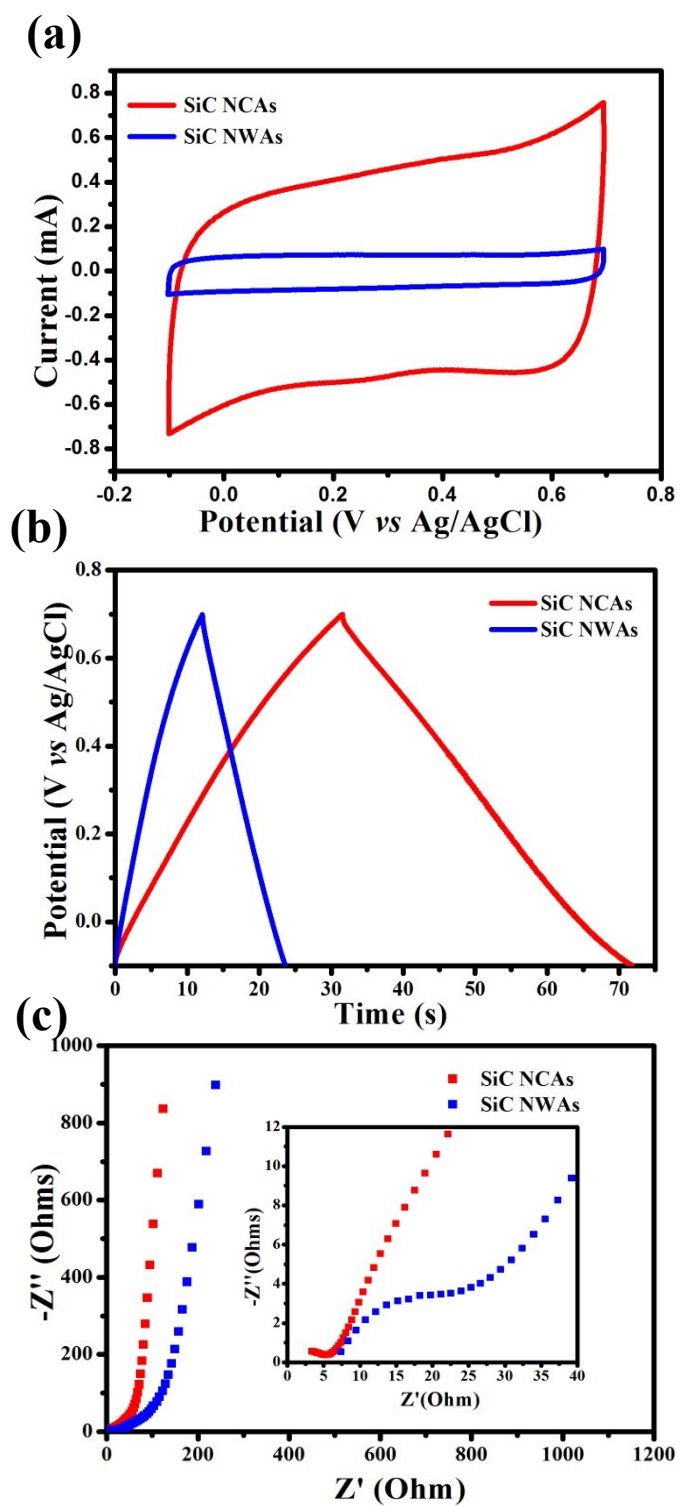

**Figure S9.** The comparison of electrochemical performances between SiC NCAs and SiC NWAs electrodes.

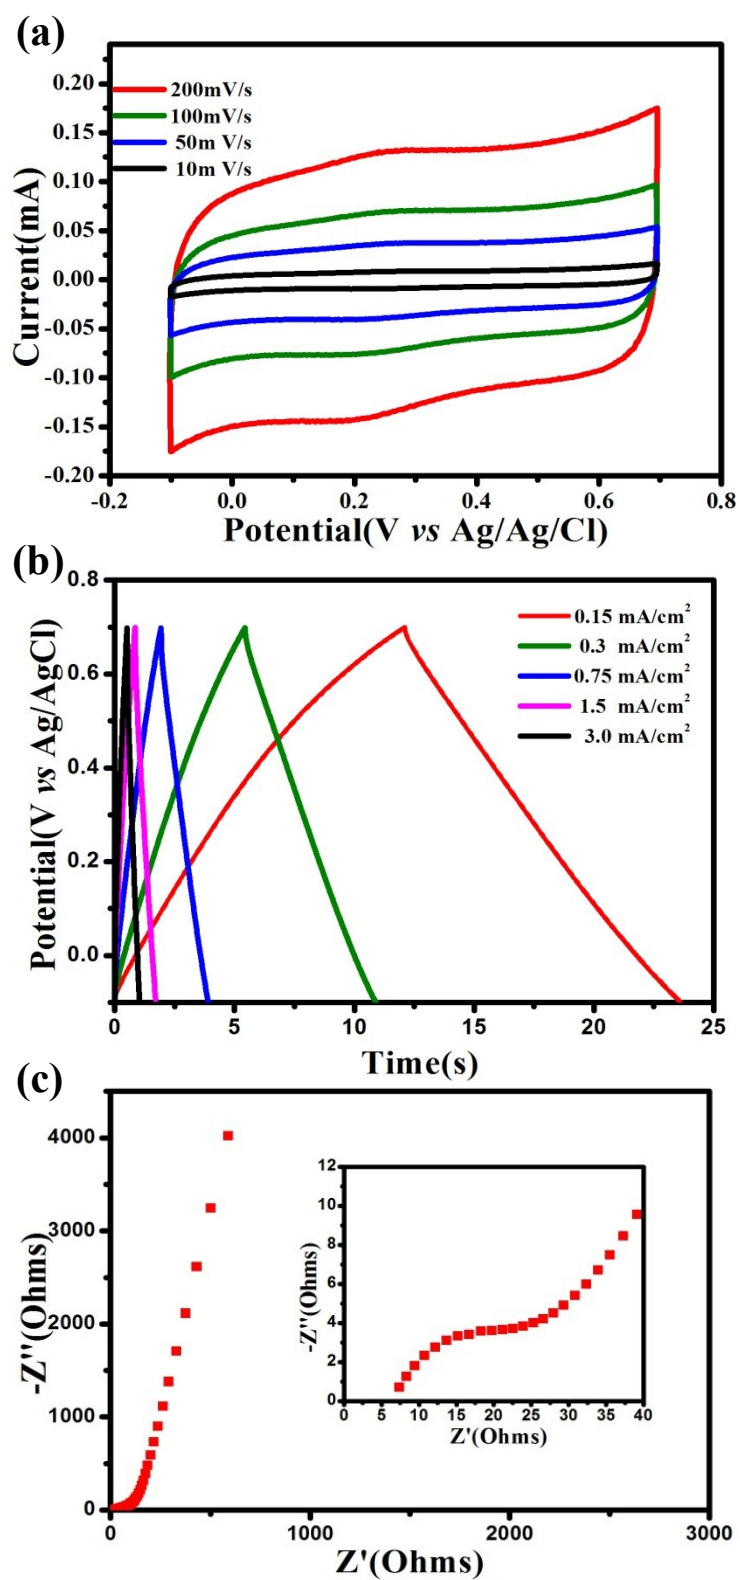

**Figure S10.** The detailed electrochemical performances of SiC NWAs electrodes.

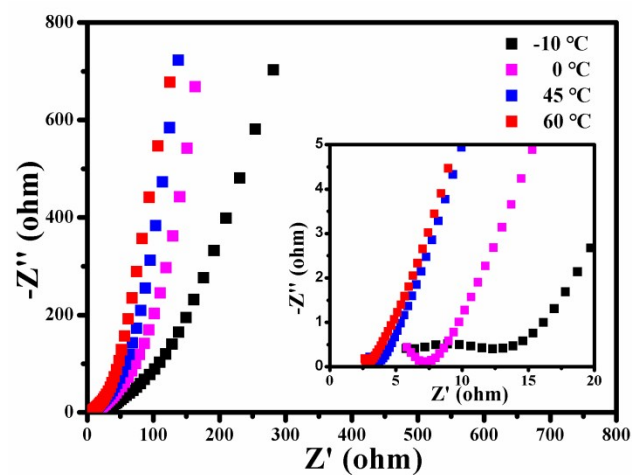

**Figure S11.** The electrochemical impedance spectroscopy (EIS) of the SiC NCAs electrode under different temperatures.

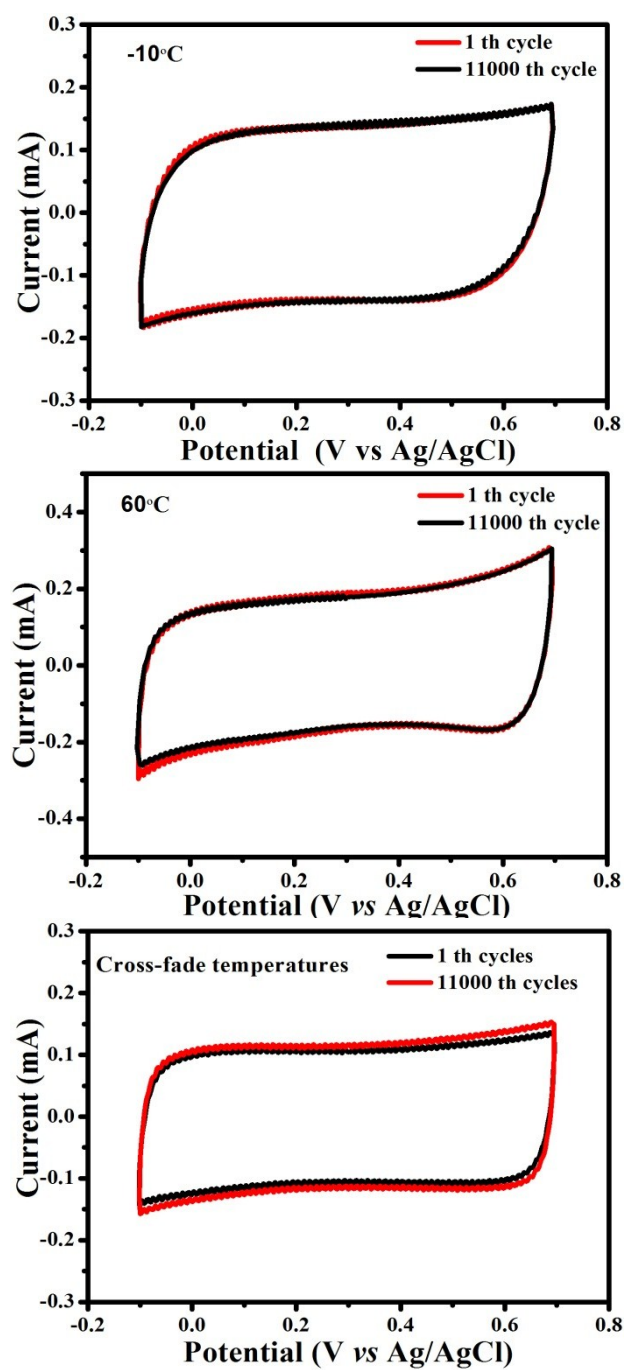

**Figure S12.** The CV curves of SiC NCAs electrode when subjected to be serviced under low, high and cross-fade temperatures between low and high temperatures for 11000 charge-discharge cycles.



**Table S1.** Overview of the specific capacitance of SiC array structure

| Materials           | Synthetic method                         | Specific capacitance                             | Stability                       | Ref.      |
|---------------------|------------------------------------------|--------------------------------------------------|---------------------------------|-----------|
| SiC Nanochannels    | Electrochemical anodic oxidation         | 14.8 mF cm <sup>-2</sup> at 10mV s <sup>-1</sup> | Retaining 96% for 10000 cycles  | This work |
| SiC Nanowires array | Chemical vapor deposition                | 350 μF cm <sup>-2</sup> at 0.5V s <sup>-1</sup>  | Retaining ~100% for 2000 cycles | 1         |
| SiC Nanowires       | Low-pressure chemical vapor deposition   | 240μFcm <sup>-2</sup> at 100mV s <sup>-1</sup>   | Retaining 95% for 200000 cycles | 2         |
| SiC Nanowires       | Chemical vapor deposition                | 23mF cm <sup>-2</sup> at 50 mV s <sup>-1</sup>   | Retaining 90% for 100000 cycles | 3         |
| SiC Nanowires       | Chemical vapor deposition                | 4.7mF cm <sup>-2</sup> at 10mV s <sup>-1</sup>   | Retaining 98% for 10000 cycles  | 4         |
| Si/SiC Nanowires    | Etch technique/chemical vapor deposition | 1.7mF cm <sup>-2</sup> at 50 mV s <sup>-1</sup>  | Retaining 95% for 200000 cycles | 5         |
| SiC nanowires       | Carbothermal reduction method            | 37 mF cm <sup>-2</sup> at 0.3 A cm <sup>-2</sup> | Retaining 100% for 2000 cycles  | 6         |
| SiC Nanowires       | Chemical vapor deposition                | 92 μFcm <sup>-2</sup> at 100mVs <sup>-1</sup>    | Retaining 60% for 10000 cycles  | 7         |

**Table S2.** Overview of the specific capacitance of SiC array structure

| Materials                        | Electrolyte                                            | Capacitance change  | Stability                                                                                                                        | Ref.      |
|----------------------------------|--------------------------------------------------------|---------------------|----------------------------------------------------------------------------------------------------------------------------------|-----------|
| SiC Nanochannels                 | KCl aqueous solution                                   | 136% , -10 to 60°C  | Retaining 97.3%, 96.8 % and 95.5 at -10, 60 °C and cross-fade temperatures between -10 and 60 °C for 11000 cycles, respectively. | This work |
| TiC nanotube branches            | LiClO <sub>4</sub> acetonitrile solution               | 150%,-15 to 65 °C   | Retaining 67% at -15 °C for 50000 cycles                                                                                         | 8         |
| TiC@crystalline PPy (PVA)        | NaNO <sub>3</sub> aqueous solution                     | 112%,-18 to 60 °C   | Retaining 40% at 60 °C for 5000 cycles                                                                                           | 9         |
| Graphene Thin sheet              | Li <sub>2</sub> SO <sub>4</sub> /Ethylene glycol/Water | 134,-20 to 45 °C,   | Retaining 92% at 45°C for 5000 cycles                                                                                            | 10        |
| Carbon                           | Eutectic mixture of ionic liquids                      | 76% , -50 to 40°C   | /                                                                                                                                | 11        |
| NiCo <sub>2</sub> O <sub>4</sub> | KOH aqueous solution                                   | 150% , -10 to 60 °C | /                                                                                                                                | 4         |

**Reference:**

- Alper, J. P.; Gutes, A.; Carraro, C.; Maboudian, R., Semiconductor nanowires directly grown on graphene--towards wafer scale transferable nanowire arrays with improved electrical contact. *Nanoscale* **2013**, 5,4114-8.
- Alper, J. P.; Kim, M. S.; Vincent, M.; Hsia, B.; Radmilovic, V.; Carraro, C.; Maboudian, R., Silicon carbide nanowires as highly robust electrodes for micro-supercapacitors. *J. Power Sources* **2013**, 230,298-302.
- Gu, L.; Wang, Y. W.; Fang, Y. J.; Lu, R.; Sha, J., Performance characteristics of supercapacitor electrodes made of silicon carbide nanowires grown on carbon fabric. *J. Power Sources* **2013**, 243 648-653.
- Chen, Y., Zhang, X. N.; Xie, Z. P., Flexible Nitrogen Doped SiC Nanoarray for

Ultrafast Capacitive Energy Storage. *ACS nano* **2015**, *9*,8054–8063.

5. Alper, J. P.; Vincent, M.; Carraro, C.; Maboudian, R., Silicon carbide coated silicon nanowires as robust electrode material for aqueous micro-supercapacitor. *Appl. Phys. Lett.* **2012**, *100*,163901.
6. Chen, J.; Zhang, J.; Wang, M.; Gao, L.; Li, Y., SiC nanowire film grown on the surface of graphite paper and its electrochemical performance. *J. Alloys Compd.* **2014**, *605*,168-172.
7. Chang, C. H.; Hsia, B.; Alper, J. P.; Wang, S.; Luna, L. E.; Carraro, C.; Lu, S. Y.; Maboudian, R., High-Temperature All Solid-State Microsupercapacitors based on SiC Nanowire Electrode and YSZ Electrolyte. *ACS Appl. Mater. Interfaces* **2015**, *7*,26658-26665.
8. Xia, X.; Zhang, Y.; Chao, D.; Xiong, Q.; Fan, Z.; Tong, X.; Tu, J.; Zhang, H.; Fan, H. J., Tubular TiC fibre nanostructures as supercapacitor electrode materials with stable cycling life and wide-temperature performance. *Energy Environ. Sci.* **2015**, *8*,1559-1568.
9. Weng, Y. T.; Pan, H. A.; Wu, N.-L.; Chen, G. Z., Titanium carbide nanocube core induced interfacial growth of crystalline polypyrrole/polyvinyl alcohol lamellar shell for wide-temperature range supercapacitors. *J. Power Sources* **2015**, *274*,1118-1125.
10. Vellacheri, R.; Al-Haddad, A.; Zhao, H.; Wang, W.; Wang, C.; Lei, Y., High performance supercapacitor for efficient energy storage under extreme environmental temperatures. *Nano Energy* **2014**, *8*,231-237.

11. Huang, P.; Pech, D.; Lin, R.; McDonough, J. K.; Brunet, M.; Taberna, P. L.; Gogotsi, Y.; Simon, P., On-chip micro-supercapacitors for operation in a wide temperature range. *Electrochem. Commun.* **2013**, *36*,53-56.
